# Supplementary material for: Systematic Review of the Literature and Evidence-Based Recommendations for Antibiotic Prophylaxis in Trauma: Results from an Italian Consensus of Experts
Source: PubMed Central journal article supplement (PMC4239082; doi:10.1371/journal.pone.0113676), 2014-11-20

### RCTs - % difference between Controls and Treatment

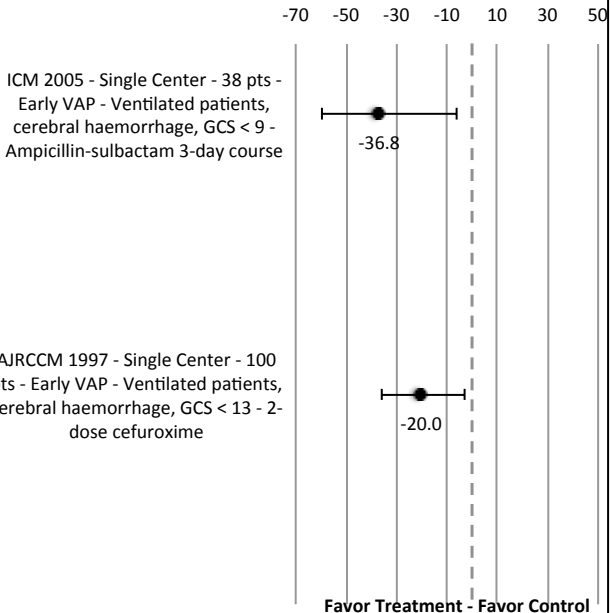

### RCTs - RR Treatment/Controls

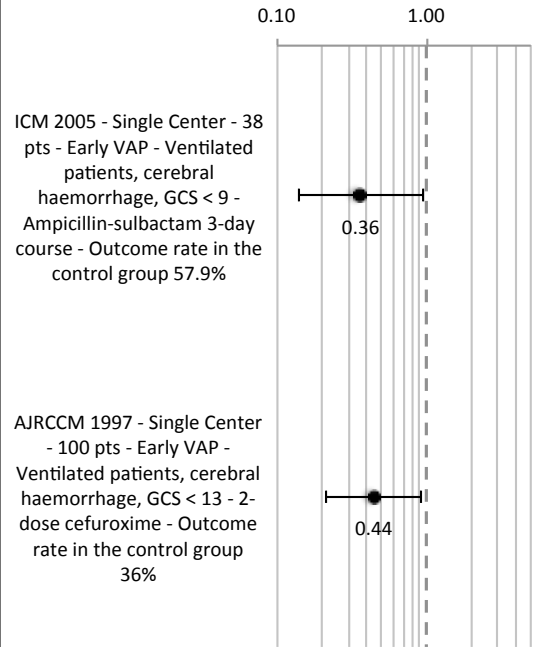

Supplement: pone.0113676.s001.pdf [file pone.0113676.s001.pdf]
