# Supplementary material for: Systematic Review of the Literature and Evidence-Based Recommendations for Antibiotic Prophylaxis in Trauma: Results from an Italian Consensus of Experts
Source: PubMed Central journal article supplement (PMC4239082; doi:10.1371/journal.pone.0113676), 2014-11-20
Supplement: pone.0113676.s002.pdf [file pone.0113676.s002.pdf]

### RCTs - % difference between Controls and Treatment

-60 -40 -20 0 20 40

Injury 1992 - Single Center - 37 pts - Meningitis reduction - Basilar skull fractures - 3-day course ceftriaxone or ampicillin/sulphadiazine

-8.3

J.NeuroS 2004 - Single Center - 109 pts - Meningitis reduction - Acute traumatic pneumocephalus verified by CT scan - 5-day course ceftriaxone

-2.6

SurgNeur 1976 - Single Center - 52 pts - Meningitis reduction - Traumatic rhinorrhoea or otorrhoea - Average 7.7 days course penicillin

-3.8

Favor Treatment - Favor Control

### RCTs - RR Treatment/Controls

0.10 1.00

Injury 1992 - Single Center - 37 pts - Meningitis reduction - Basilar skull fractures - 3-day course ceftriaxone or ampicillin/sulphadiazine - Outcome rate in the control group 8.3%

J.NeuroS 2004 - Single Center - 109 pts - Meningitis reduction - Acute traumatic pneumocephalus verified by CT scan - 5-day course ceftriaxone - Outcome rate in the control group 21.4%

SurgNeur 1976 - Single Center - 52 pts - Meningitis reduction - Traumatic rhinorrhoea or otorrhoea - Average 7.7 days course penicillin - Outcome rate in the control group 3.8%

0.88
