# Supplementary material for: Systematic Review of the Literature and Evidence-Based Recommendations for Antibiotic Prophylaxis in Trauma: Results from an Italian Consensus of Experts
Source: PubMed Central journal article supplement (PMC4239082; doi:10.1371/journal.pone.0113676), 2014-11-20
Supplement: pone.0113676.s003.pdf [file pone.0113676.s003.pdf]

### RCTs - % difference between Controls and Treatment

-60 -40 -20 0 20 40

AOS 1982 - Single Center - 90 pts -  
Wound infection (not specifically  
osteomyelitis) - Long-bone open  
fractures - 48-hour course  
dicloxacillin or penicillin

-13.3

JOT 1987 - Single Center - 87 pts -  
Wound infection (not specifically  
osteomyelitis) - Long-bone open  
fractures - 10-day course cloxacillin

-22.6

Favor Treatment - Favor Control

### RCTs - RR Treatment/Controls

0.01 0.10 1.00

AOS 1982 - Single Center - 90  
pts - Wound infection (not  
specifically osteomyelitis) -  
Long-bone open fractures -  
48-hour course dicloxacillin  
or penicillin - Outcome rate  
in the control group 20%

0.33

JOT 1987 - Single Center - 87  
pts - Wound infection (not  
specifically osteomyelitis) -  
Long-bone open fractures -  
10-day course cloxacillin -  
Outcome rate in the control  
group 27.3%

0.17
