# Supplementary material for: Systematic Review of the Literature and Evidence-Based Recommendations for Antibiotic Prophylaxis in Trauma: Results from an Italian Consensus of Experts
Source: PubMed Central journal article supplement (PMC4239082; doi:10.1371/journal.pone.0113676), 2014-11-20
Supplement: pone.0113676.s004.pdf [file pone.0113676.s004.pdf]

### RCTs - % difference between Controls and Treatment

-60 -40 -20 0 20 40

Surgery 1992 - Single Center - 515 pts - Deep surgical site infections - Penetrating abdominal trauma - 24-hour cefoxitin or cefotetan vs. 5-day cefoxitin or cefotetan

-2.1

JT 2000 - 4 Centres - 317 pts - Deep surgical site infections - Penetrating abdominal trauma - 24-hour ampicillin-sulbactam vs. 5-day ampicillin-sulbactam

-1.8

AJ Surg 1999 - 2 Centres - 300 pts - Deep surgical site infections - Penetrating abdominal trauma - 24-hour cefoxitin vs. 5-day cefoxitin

0.2

Favor Treatment - Favor Control

### RCTs - RR Treatment/Controls

0.10 1.00

Surgery 1992 - Single Center - 515 pts - Deep surgical site infections - Penetrating abdominal trauma - 24-hour cefoxitin or cefotetan vs. 5-day cefoxitin or cefotetan - Outcome rate in the control group 10%

0.79

JT 2000 - 4 Centres - 317 pts - Deep surgical site infections - Penetrating abdominal trauma - 24-hour ampicillin-sulbactam vs. 5-day ampicillin-sulbactam - Outcome rate in the control group 10.1%

0.82

AJ Surg 1999 - 2 Centres - 300 pts - Deep surgical site infections - Penetrating abdominal trauma - 24-hour cefoxitin vs. 5-day cefoxitin - Outcome rate in the control group 5.9%

1.03
